# Supplementary material
Source: PubMed Central journal article supplement (PMC3012591)
Supplement: blood-2009-11-252841_1.pdf [file blood-2009-11-252841_1.pdf]

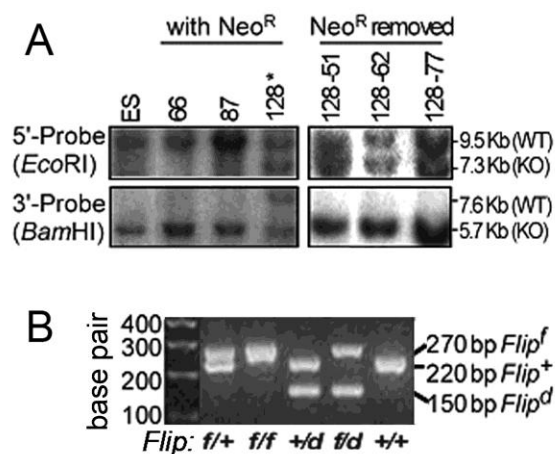

**Figure S1. Generation of *Flip* conditional Knock out mouse.** (A). Southern blot analysis of *Flip* targeted mouse ES cells. Genomic DNA of neomycin resistant ES clones was digested by *Eco*RI and hybridized with <sup>32</sup>P-labeled 5'- probe (top panel), or digested by *Bam*HI and hybridized with 3'-probe (lower panel). Clone #128 displays the 7.3-kb targeted allele identified by the 5'-probe and the 7.6-kb targeted allele identified by the 3'-probe. The presence of the wild-type (WT) allele (9.5Kb by 5'-probe and 5.7 Kb by 3'-probe) indicates these cells are heterozygous for the targeted *Flip* allele. In clones #66 and #87 the targeting construct was randomly inserted. The *neo*<sup>R</sup> cassette was removed from 3 clones derived from clone 128 (clones 51, 62, 77), indicated by the 3'-probe that hybridized with a 5.7 Kb fragment, which were employed to generate chimeric mice by blastocyst injection and embryo re-implantation in C57BL/C mice. (B) PCR genotyping of *Flip* by genomic DNA extracted from tail biopsies. Three *Flip* alleles were identified: 270bp for floxed (*Flip*<sup>f</sup>), 220bp for WT (*Flip*<sup>+</sup>) and 150bp for deleted (*Flip*<sup>d</sup>).

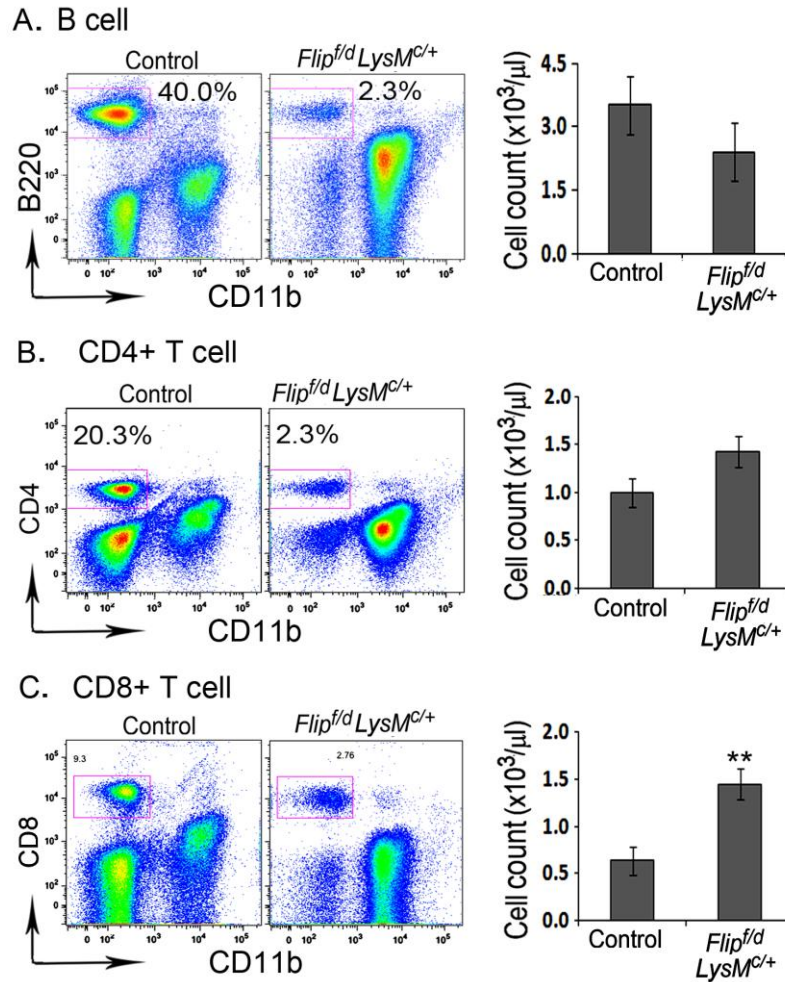

**Figure S2. Analysis of lymphocytes in peripheral blood.** The B cells (A) and CD4+ (B) or CD8+ (C) T cells in the peripheral blood of control or *Flip<sup>f/d</sup>, LysM<sup>c/+</sup>* mice were assessed by flow cytometry. Lymphocytes were identified as CD45+, CD11b-, NK1.1- and CD11c-, plus B220+, CD4+, CD8+ for B cells and CD4+ or CD8+ T cells, respectively (n = 8 for each group). A representative example of the distribution of B cells and CD4+ or CD8+ T cells in total CD45+ population is presented on the right. The absolute counts for each cell type is presented based on the total white blood cell counts which were  $7.9 \pm 1.3$  ( $\pm 1$  SE) for the controls and  $49.1 \pm 7.3$  ( $\times 10^4/\mu\text{l}$  blood) for the *Flip<sup>f/d</sup>, LysM<sup>c/+</sup>* mice ( $p=0.002$ ). \*\* represents  $p < 0.01$  compared with controls.

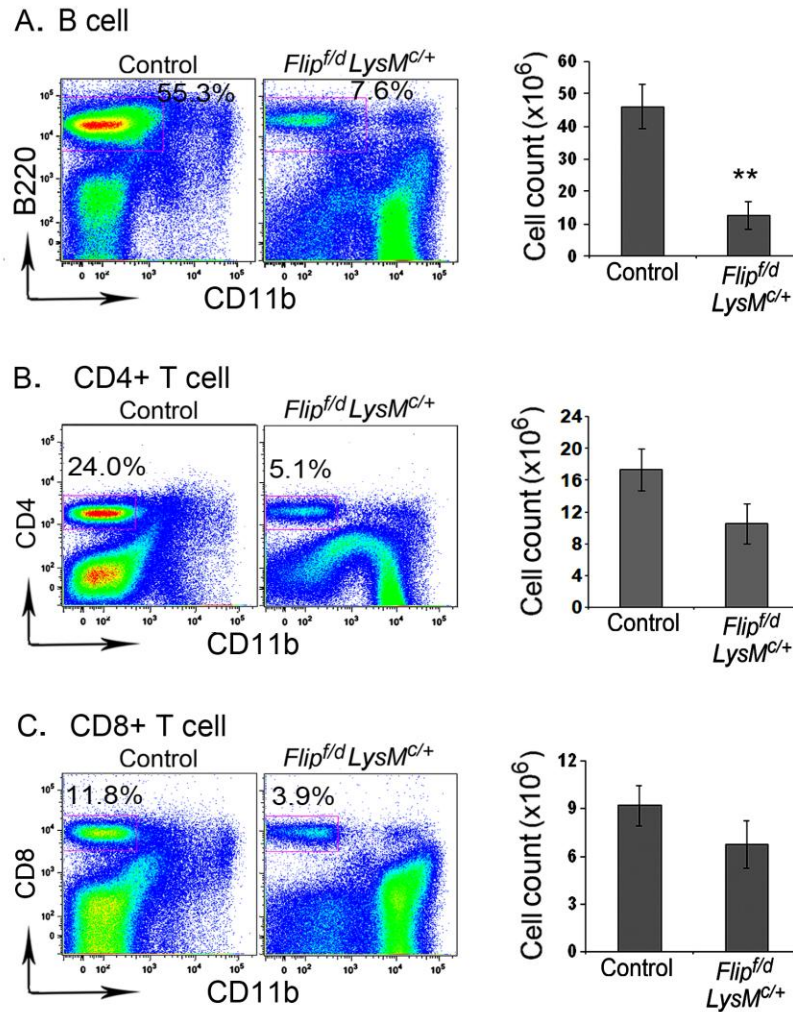

**Figure S3. Analysis of lymphocytes in spleen.** The presence of B cells (A) and CD4+ (B) or CD8+ (C) T cells in the spleens of control and *Flip<sup>f/d</sup>, LysM<sup>c/+</sup>* mice was determined by flow cytometry (n = 4 for each represented group). Lymphocytes were identified as indicated in Supplemental Figure 2. Representative examples of the distributions of B cells and CD4+ and CD8+ T cells are presented in the panels on the left. The total numbers of each cell type were determined based on the number of live splenocytes in each group ( $87.5 \pm 11.6$  and  $147.5 \pm 25.9$  ( $\times 10^6$ ) for control and *Flip<sup>f/d</sup>, LysM<sup>c/+</sup>* mice). \*\* represents  $p < 0.01$  compared with controls.

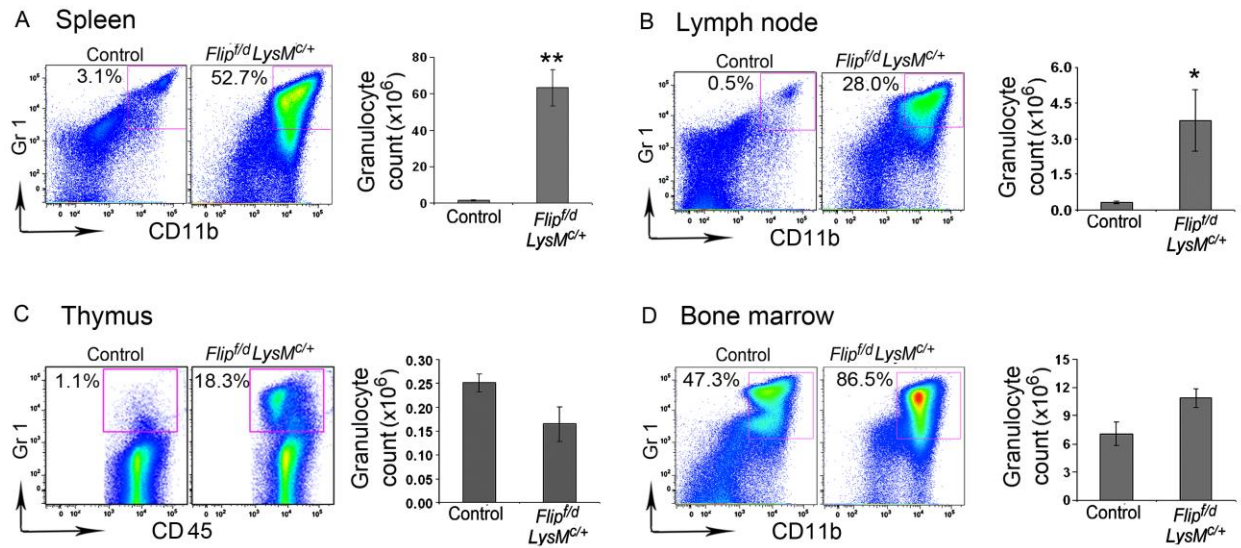

**Figure S4. Analysis of granulocytes in the lymphoid organs.** Granulocyte

infiltration in spleen(A), lymph node (B), thymus(C) and bone marrow (D) of control and *Flip<sup>f/d</sup>*, *LysM<sup>c/+</sup>* mice were assessed by flow cytometry. Granulocytes were identified as CD45+, CD11b+, NK1.1-, CD11c-, B220-, CD4-, CD8- and Gr1+ (n = 4 for each represented group). A representative example of the distribution of Gr1+ and 11b+ granulocytes in total CD45+ population is presented on the left of each panel. The total numbers ( $\times 10^6$ ) of live cells in the littermate controls and *Flip<sup>f/d</sup>*, *LysM<sup>c/+</sup>* mice were:  $87.5 \pm 11.6$  and  $147.5 \pm 25.9$  (splenocytes);  $141.3 \pm 12.8$  and  $25.4 \pm 10.1$  (cells from lymph nodes,  $p < 0.01$ );  $222.5 \pm 31.7$  and  $5.1 \pm 2.4$  (thymocytes,  $p < 0.001$ ) and  $16.0 \pm 2.3$  and  $12.8 \pm 1.2$  (cells from tibias). \* represents  $p < 0.05$  and \*\*  $p < 0.01$  compared with control groups.



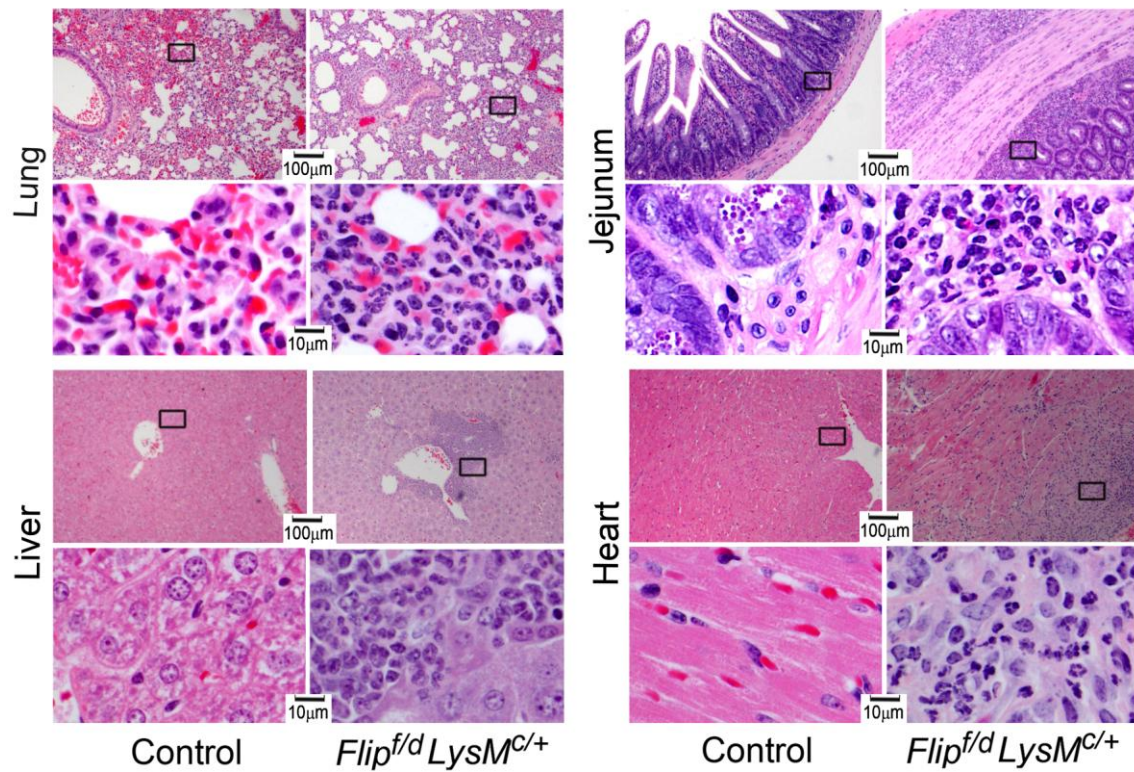

**Figure S5. Increased leukocyte infiltration in non-lymphoid organs.**

Representative tissue sections from the indicated organs from *Flip<sup>f/d</sup>*, *LysM<sup>c/+</sup>* and littermate control mice were stained with hematoxylin and eosin. The area identified by the box is enlarged in the panel below.

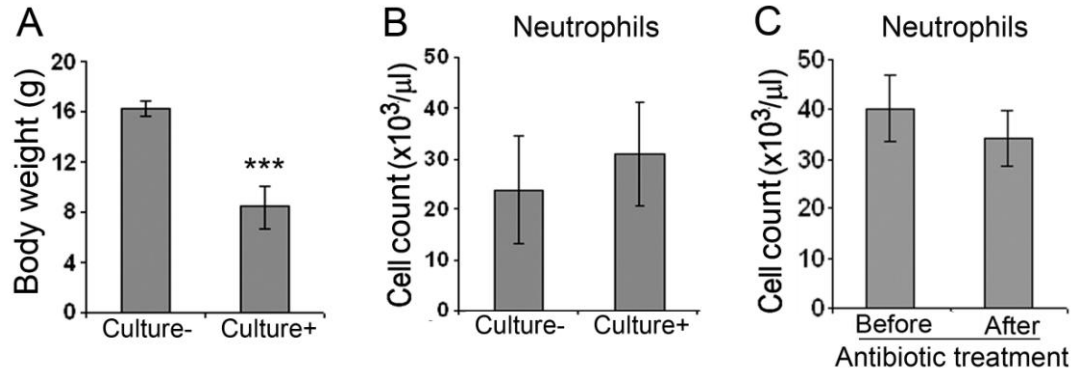

**Figure S6. Analysis of infection in *Flip<sup>f/d</sup>*, *LysM<sup>c/+</sup>* and control mice.** The peritoneal cavity, thymus, spleen, liver, and lymph nodes of *Flip<sup>f/d</sup>*, *LysM<sup>c/+</sup>* (n = 13) and control mice were cultured. Body weight (A) and neutrophil counts (B) were determined in the culture positive (n=4) and negative mice (n = 9). *Flip<sup>f/d</sup>*, *LysM<sup>c/+</sup>* mice (n = 20) were treated with ampicillin +/- gentimycin, and circulating neutrophil counts were performed before and after treatment (C). \*\*\* represents p < 0.001.

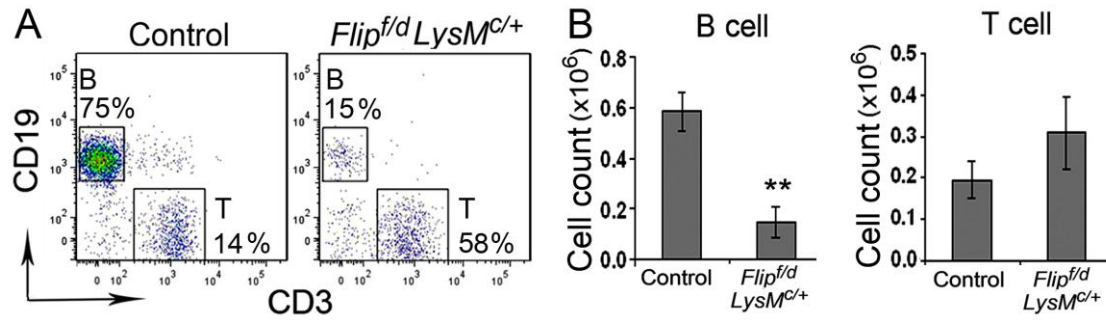

**FigureS7. Analysis of lymphocytes in the peritoneum.** (A) A representative example of lymphocytes (CD11b<sup>-</sup>) stained with anti-CD19 and -CD3 employing control and *Flip<sup>f/d</sup> LysM<sup>c/+</sup>* mice. (B) The number of B and T lymphocytes present in the peritoneal cavity was determined following flow cytometry (n = 8 and 13 for control and KO, respectively). \*\* represents p < 0.01.

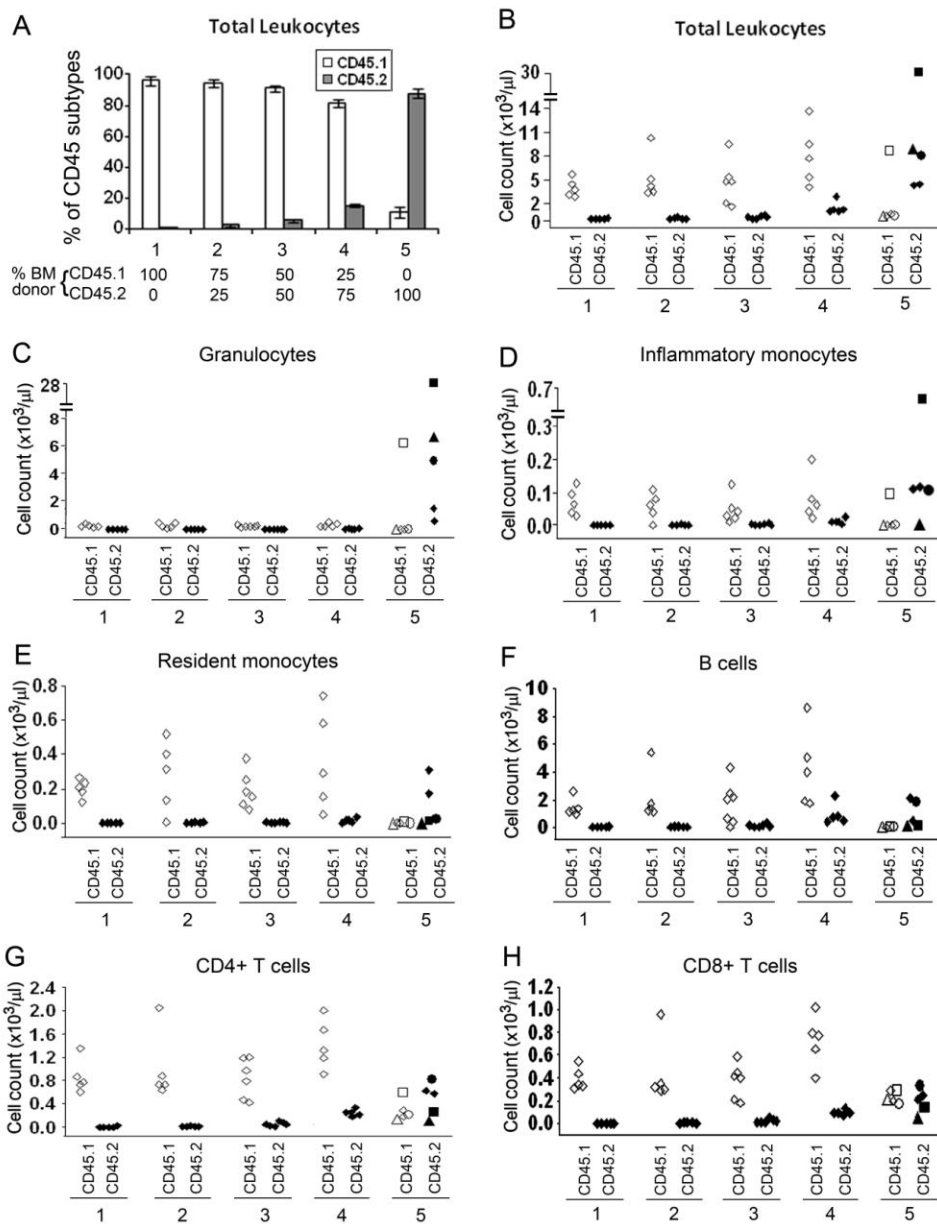

**Figure S8. *Flip<sup>fd</sup>*, *LysM<sup>c/+</sup>* mice demonstrate a cell intrinsic defect in bone**

**marrow transplants.** (A) *Flip<sup>fd</sup>*, *LysM<sup>c/+</sup>* (CD45.2<sup>+</sup>) bone marrow cells failed to compete with wild bone marrow cells (CD45.1<sup>+</sup>), indicated by the % of CD45 subtypes in peripheral blood 8

weeks post transplantation. (B-H) The cell numbers were calculated for the indicated cell types from peripheral blood ( $10^3/\mu\text{l}$ ) by total white blood cell count and flow cytometry in mice from groups 1-



5, which received *Flip<sup>f/d</sup>*, *LysM<sup>c/+</sup>* donor BM cells at 0, 25, 50, 75 and 100%, respectively. Cells from CD45.1 and CD45.2 subtype were indicated as open and solid symbols. Three individual mice in group 5 were specified by matched symbols.
